# Supplementary material for: The role of nanopores constructed on the micropitted titanium surface in the immune responses of macrophages and the potential mechanisms
Source: Royal Society of Chemistry journal article supplement (doi:10.1039/d2tb01263d), 2022-01-01
Supplement: d2tb01263d1.pdf [file d2tb01263d1.pdf]

## Supporting information for

### **The role of nanopores constructed on micropitted titanium surface on immune responses of macrophages and the potential mechanisms**

Ruiyue Hang<sup>a</sup>, Yuyu Zhao<sup>a</sup>, Yi Zhang<sup>a</sup>, Runhua Yao<sup>a</sup>, Xiaohong Yao<sup>a, \*</sup>, Yonghua Sun<sup>a, b, \*</sup>, Di Huang<sup>c, d</sup>, Ruiqiang Hang<sup>a, \*</sup>

*a Shanxi Key Laboratory of Biomedical Metal Materials, College of Materials Science and Engineering, Taiyuan University of Technology, Taiyuan 030024, China*

*b College of Safety and Emergency Management Engineering, Taiyuan University of Technology, Taiyuan 030024, China*

*c Department of Biomedical Engineering, Research Center for Nano-biomaterials & Regenerative Medicine, College of Biomedical Engineering, Taiyuan University of Technology, Taiyuan 030024, China*

*d Shanxi-Zheda Institute of Advanced Materials and Chemical Engineering, Taiyuan 030032, China*

\* Corresponding authors.

E-mail: xhyao@tyut.edu.cn (X.H. Yao); sunyonghua@tyut.edu.cn (Y.H. Sun);  
hangruiqiang@tyut.edu.cn (R.Q. Hang)

**Volume ratio of H<sub>2</sub>SO<sub>4</sub> and H<sub>2</sub>O<sub>2</sub>**  
**1:3                                                  3:1**

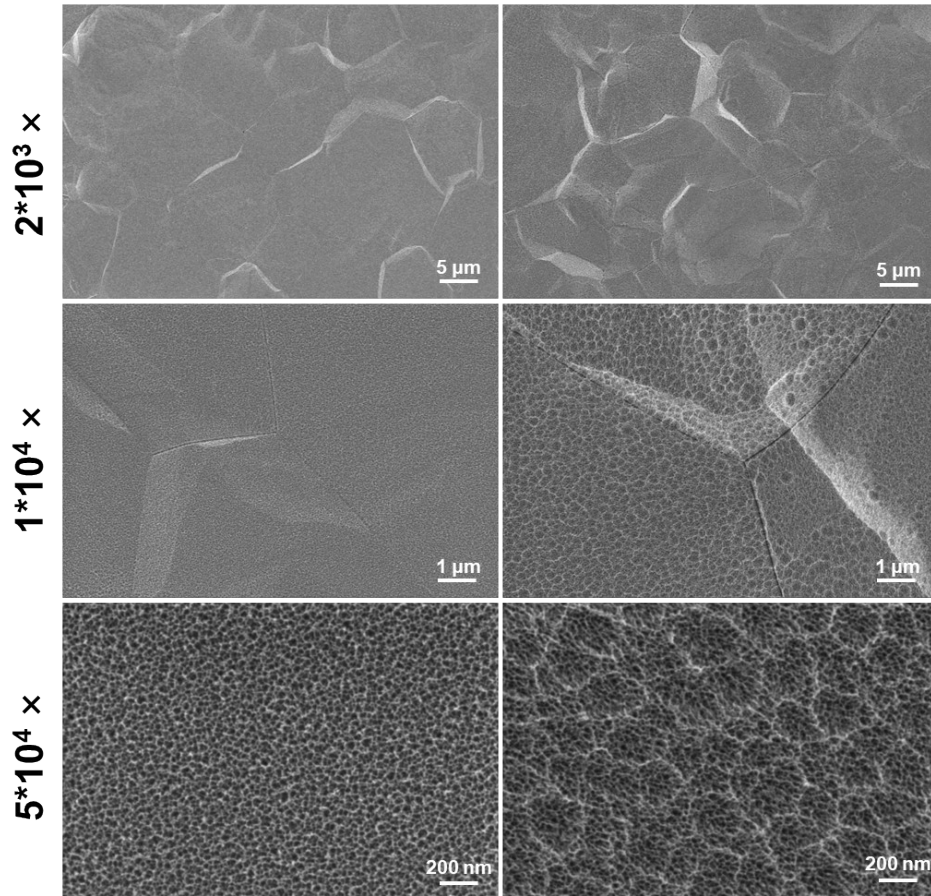

**Figure S1** Surface SEM images of the specimens acid etched at room temperature in H<sub>2</sub>SO<sub>4</sub> and H<sub>2</sub>O<sub>2</sub> solutions with different volume ratios.

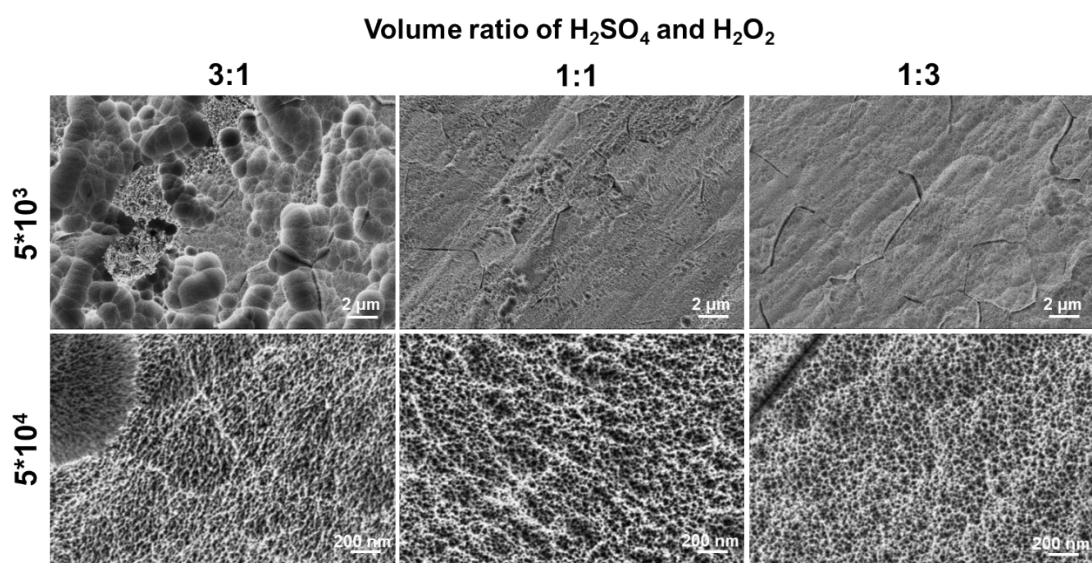

**Figure S2** Surface SEM images of the specimens acid etched at 50 °C in H<sub>2</sub>SO<sub>4</sub> and H<sub>2</sub>O<sub>2</sub> solutions with different volume ratios.

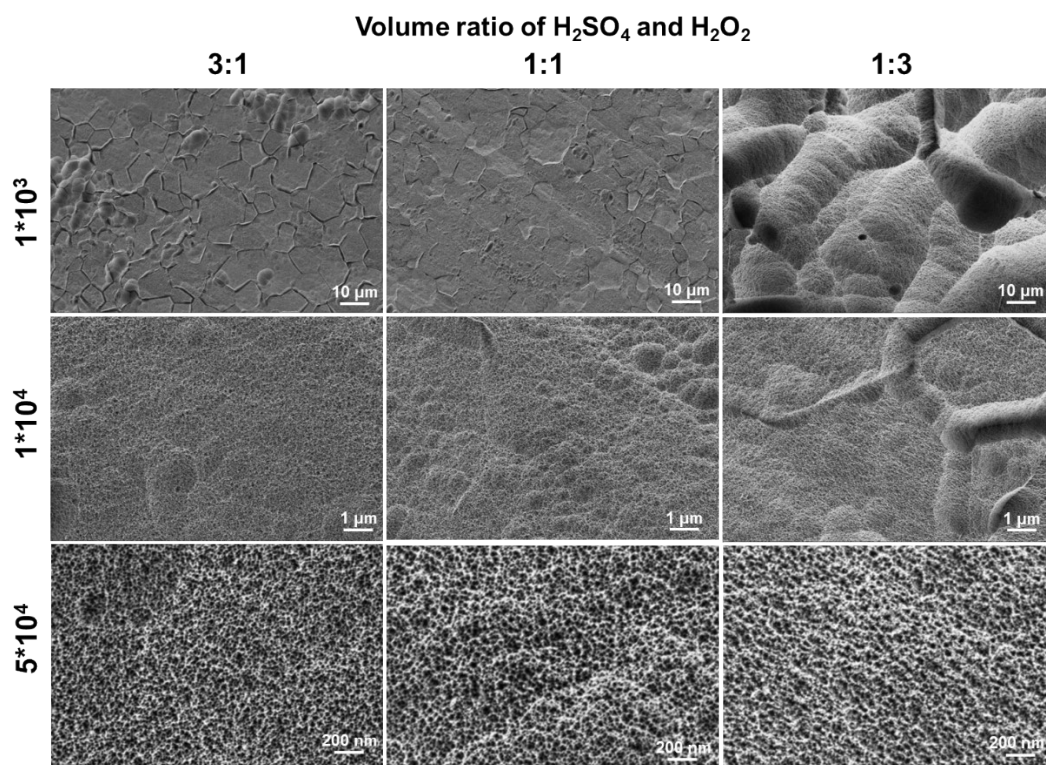

**Figure S3** Surface SEM images of the specimens acid etched at 80 °C in H<sub>2</sub>SO<sub>4</sub> and H<sub>2</sub>O<sub>2</sub> solutions with different volume ratios.

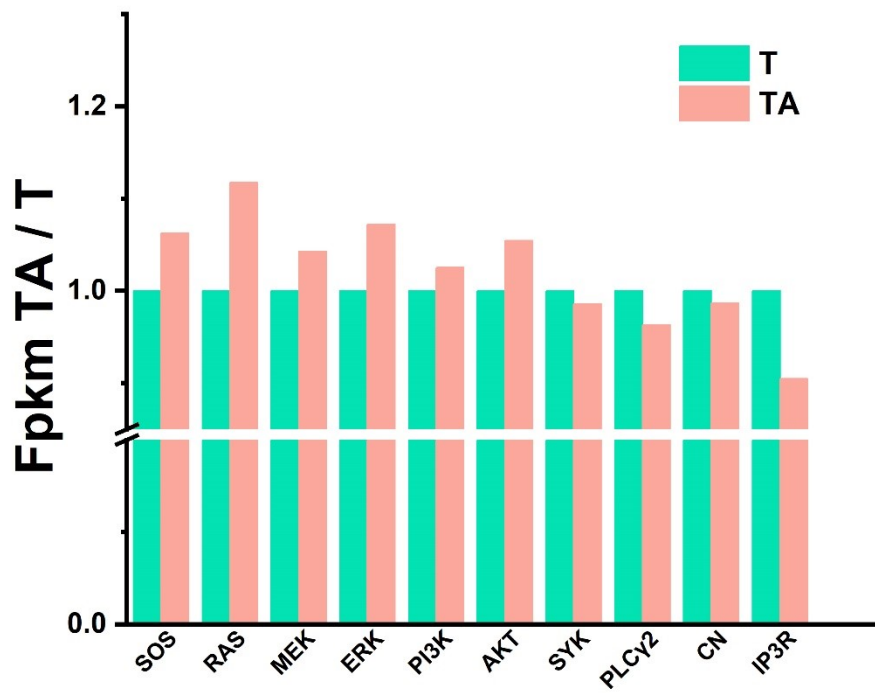

Figure S4 Expression levels of other key genes

**Table S1** Elemental composition of the specimen surfaces determined by XPS

| Specimen | Atomic concentrations (at.%) |       |       |
|----------|------------------------------|-------|-------|
|          | Ti                           | O     | C     |
| T        | 16.42                        | 45.48 | 38.10 |
| TA       | 14.10                        | 40.84 | 45.06 |
